# Supplementary material for: Humoral anti-KLH responses in cancer patients treated with dendritic cell-based immunotherapy are dictated by different vaccination parameters
Source: Springer Nature journal article supplement (doi:10.1007/s00262-012-1263-z), 2012-04-19
Supplement: MOESM1 [file 8232022]

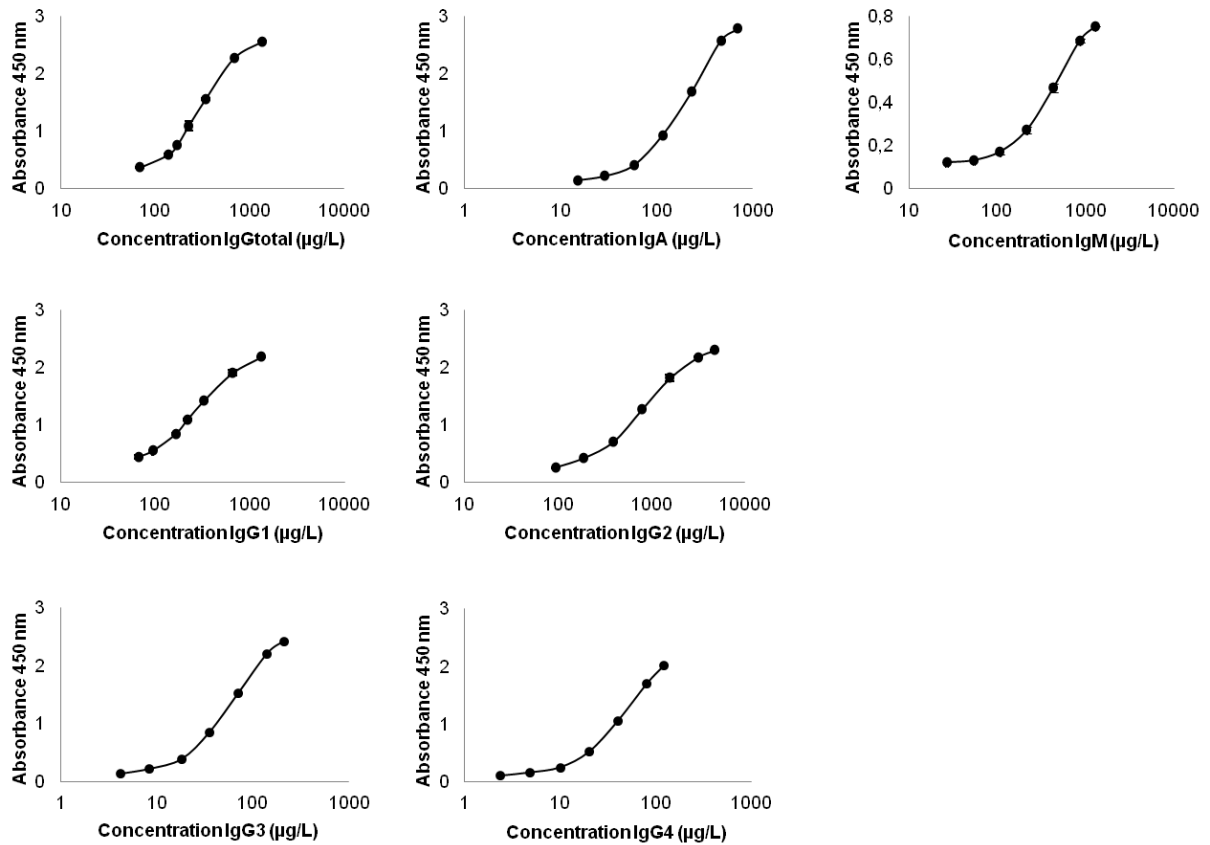

**Supplementary Fig. 1** *Anti-KLH antibody isotype-specific standard curves.*

A pool of purified KLH-specific human antibodies is serially diluted to establish isotype-specific 7-point standard curves. Dilutions were as followed, for IgG total, IgG1 and IgG4: 300x, 600x, 1200x, 1800x, 2400x, 4200x and 6000x; for IgG2, IgG3 and IgA: 50x, 100x, 150x, 250x, 500x, 750x and 1000x; for IgM: 60x, 120x, 240x, 360x, 480x, 600x and 1200x. The horizontal axis indicates the absolute concentration in µg/L not adjusted for the dilution step preceding the measurement.

**Supplementary Table 1** KLH-specific Abs after column-purification of pooled serum of patients exposed to KLH

| <b>Abs in eluate</b> | <b>Concentration</b> |
|----------------------|----------------------|
| IgG <sub>total</sub> | 1.370 mg/L           |
| IgG <sub>1</sub>     | 990 mg/L             |
| IgG <sub>2</sub>     | 470 mg/L             |
| IgG <sub>3</sub>     | 21 mg/L              |
| IgG <sub>4</sub>     | 12 mg/L              |
| IgA                  | 70 mg/L              |
| IgM                  | 130 mg/L             |

Abbreviations: Abs, antibodies
